# Supplementary material for: Biodegradable multi-liposomal containers
Source: Royal Society of Chemistry journal article supplement (doi:10.1039/c5ra00835b), 2015-01-01
Supplement: c5ra00835b1.pdf [file c5ra00835b1.pdf]

## Supporting information

### Biodegradable multi-liposomal containers

Alexander A. Yaroslavov,<sup>\*,a</sup> Anna A. Efimova,<sup>a</sup> Andrey V. Sybachin,<sup>a</sup> Sergey N. Chvalun,<sup>b</sup> Alevtina I. Kulebyakina<sup>b</sup> and Ekaterina V. Kozlova<sup>b</sup>

<sup>a</sup> Lomonosov Moscow State University, 119991, Leninskie Gory, 1-3, Moscow, Russia. Fax: +74959390174; Tel: +74959393116; E-mail: yaroslav@genebee.msu.ru

<sup>b</sup> National Research Centre "Kurchatov Institute", 123182, Akademika Kurchatova sq., 1, Moscow, Russia Fax: +74991967038; Tel: +74991967038; E-mail: [presscentr@kiae.ru](mailto:presscentr@kiae.ru)

#### Characterization of triblock-copolymer of poly-L-lactide and poly (ethylene glycol)

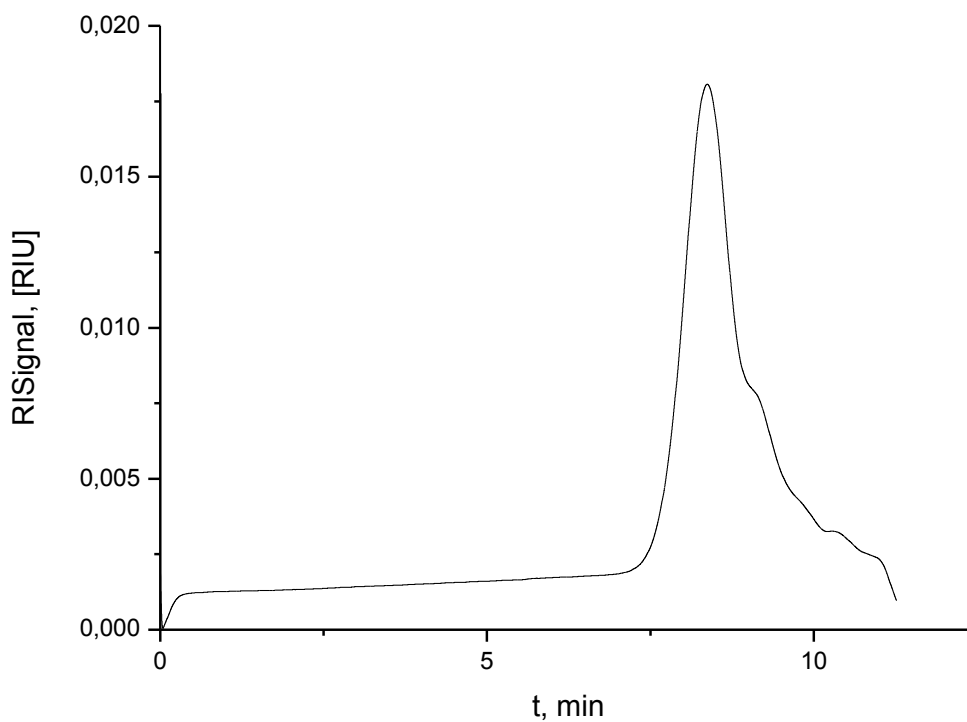

Figure A. Chromatogram of triblock-copolymer PLA<sub>52</sub>-PEG<sub>91</sub>-PLA<sub>52</sub>. Solvent – THF.

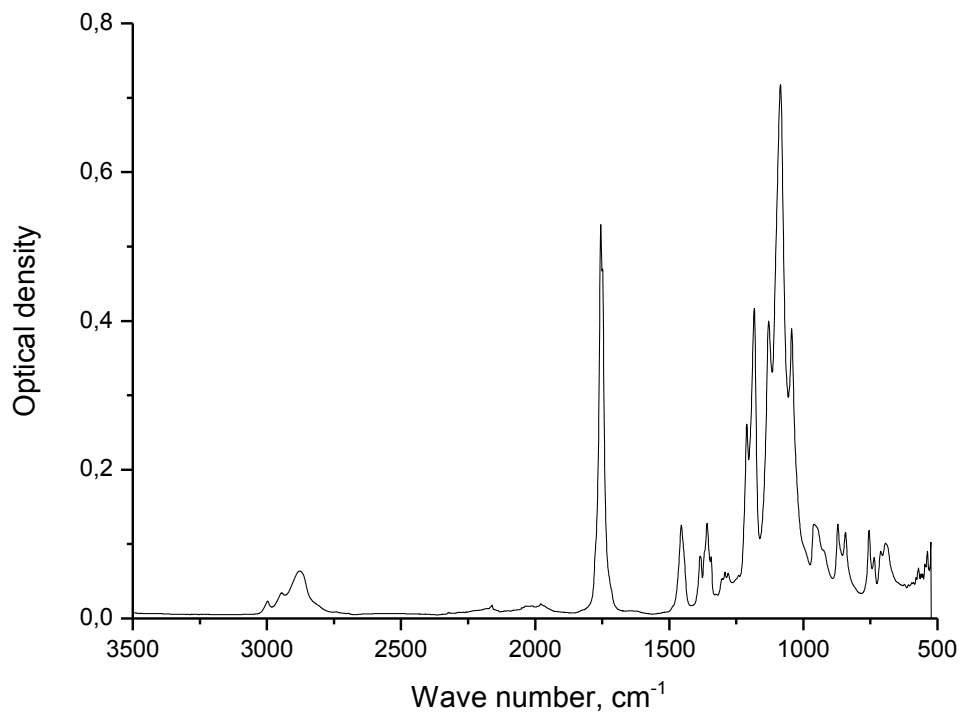

Figure B. IR-spectrum of triblock-copolymer PLA<sub>52</sub>-PEG<sub>91</sub>-PLA<sub>52</sub>.

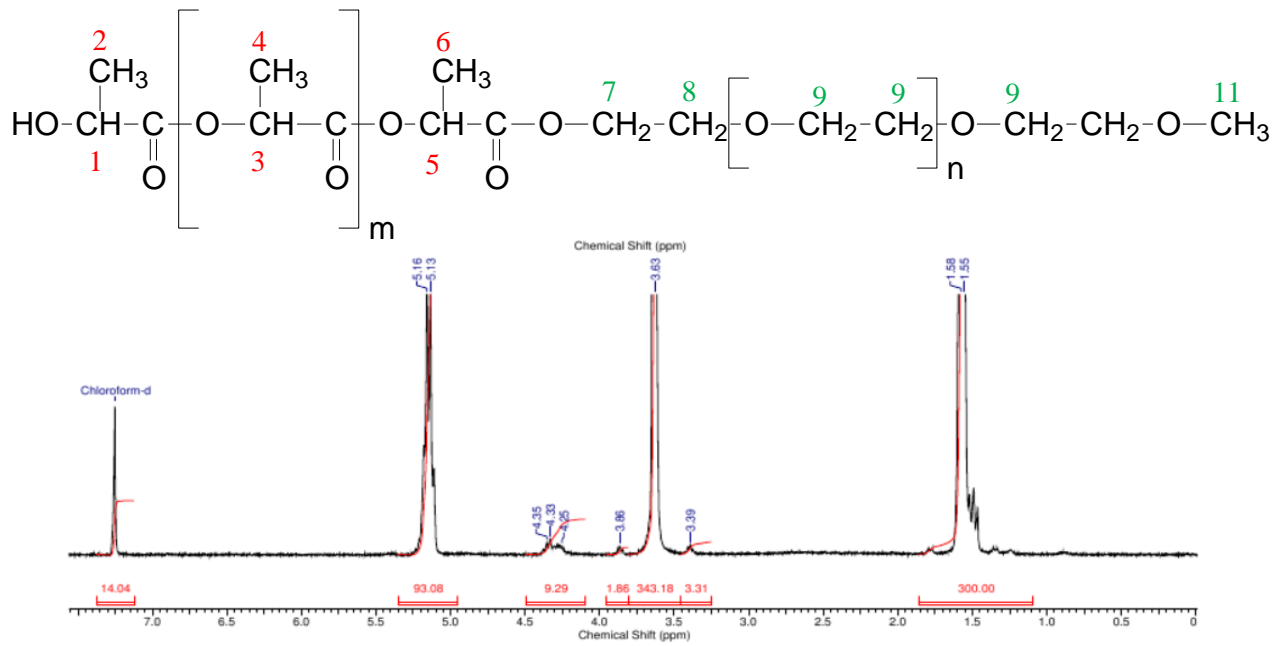

Figure C. NMR-spectrum of triblock-copolymer PLA<sub>52</sub>-PEG<sub>91</sub>-PLA<sub>52</sub>.

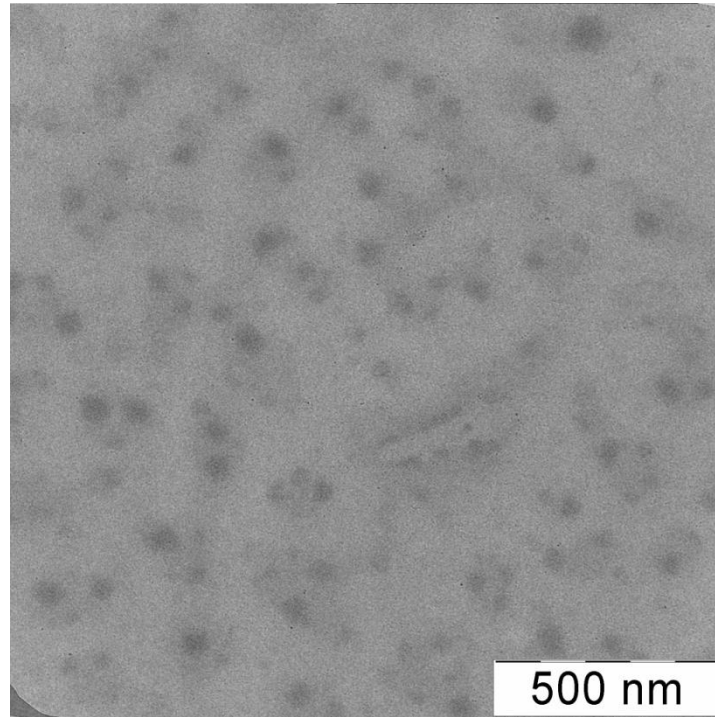

Figure D. TEM image of triblock-copolymer PLA<sub>52</sub>-PEG<sub>91</sub>-PLA<sub>52</sub> micelles.

## PEVP-to-liposome binding

A procedure described in [A. V. Sybachin , A. A. Efimova , E. A. Litmanovich , F. M. Menger and A. A. Yaroslavov, Langmuir, 2007, 23 (20), pp 10034–10039] was used. PEVP/liposome complex particles were separated from water-salt solutions by centrifugation at 16.000 rpm for 40min on Beckman centrifuge, and the optical density (Absorbance) in the supernatants were measured spectrophotometrically at  $\lambda = 257$  (circles) taking extinction coefficient of PEVP monomer unit equal to 3.350 L/(cm $\times$ mol).

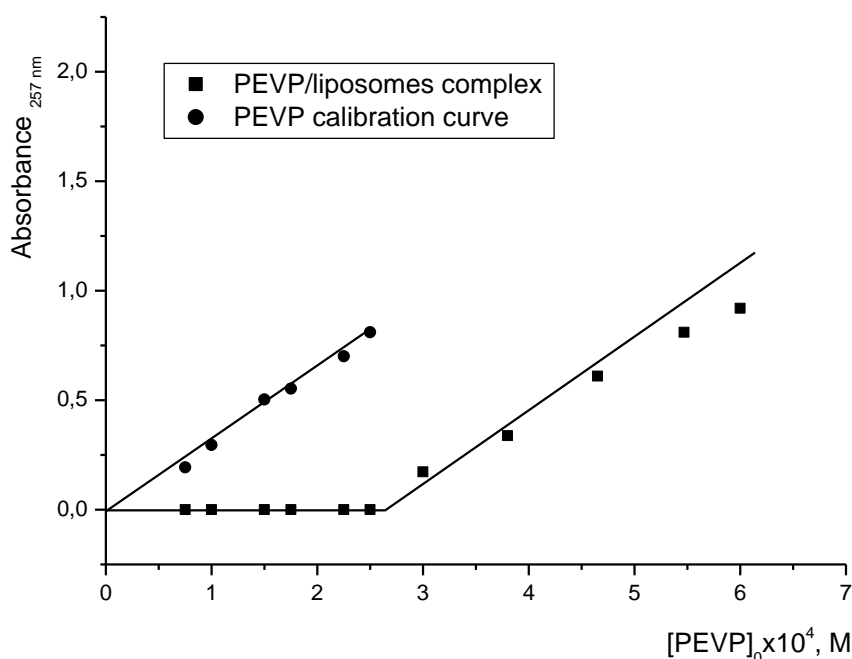

Figure E. Absorbance vs. PEVP concentration in the supernatants.

In the manuscript (Figure 3), the dependence is presented that was re-plotted using a calibration curve for a pure PEVP solution without liposomes (Figure E, squares).
